# Supplementary material for: MZF1 and SCAND1 Reciprocally Regulate CDC37 Gene Expression in Prostate Cancer
Source: PubMed Central journal article supplement (PMC6627353; doi:10.3390/cancers11060792), 2019-06-08
Supplement: cancers-11-00792-s001.pdf [file cancers-11-00792-s001.pdf]

# Supplementary Materials: MZF1 and SCAND1 reciprocally regulate *CDC37* gene expression in prostate cancer

Taka Eguchi, Thomas L. Prince, Manh Tien Tran, Chiharu Sogawa, Benjamin J. Lang and Stuart K. Calderwood

**A**

```

MZF1-BS forward:  ....GGGGA....
                   |||||
                   .....TCCC..... : reverse: MZF1-BS reverse

HSE forward:  ....GAA..TTC..GAA....
              |||||
              .....LLC..GAA..LLC..... : reverse: HSE reverse
    
```

**B**

```

CDC37/-1750
-1900 TAGCAGGGTTTGACACCGATG GGGGTGGGATGGGGACCGGG GACAGAGGGACAGTGCAAAG CAACTTAGGGGTCTCTCTCC TCAGTCCCCAGGGCTGGAGG
                                     F
-1800 TGCTGTGCTGGCAGATTAGG AAATGCTTGGGGTTGATGGG GAGCTTCCGGCGCTCTATC CCCAGTCTCGGAAGCTGAGG CTCGGGAACCCGTGTTTGC
                   MZF1 HSE MZF1 MZF1 R
-1700 TGAAGCTGGGCAGCTCCAGT CTCCAGAGCCAGGAAGAGAC CCCCGCCCTATCCGGGAAT CCCCGACATCTGGGATTCTC TCCAAACACCCCCAGGCTGA
                                     MZF1

CDC37/-1110
-1300 CCGGGCCGTGACGGCCACTG ATGTGCTGGACTGCCAGGTT GAGGGGAGAGAGGGAGGGGT AGGAGATGGGGA TCCCCCG CCCCTGCCCGCCCACTCGGG
                   MZF1 MZF1 MZF1
-1200 GGTITGAATGAAGCGGAGG GGGGAGGGCGGCAGCGGGAG GACGTTTTTGTCCGATGGCC CTTCOCGCTCCATGCACC GG GGAATCC TCCCCTTCCTGGA
                   MZF1 F MZF1 HSE MZF1
-1100 GAACTTCGCTCGCTCTCTCC AGGCACTGCCTCCAACGTCG GCTCCAGGGGACTAGGAA GAGGCGCCCTCACCGGAGT GGCTGGAGCTCCTCCTATCC
                   R MZF1

CDC37/-380
-500 CCCAGCTCCCAAGGCAGGG CCACAGTC TCCCCTCCACGT TTAACCCCTGCAA GGGGAGGG CCATACCACCCCGATTAG ACACCCCAAGGGCAGGTCCA
                   MZF1 MZF1 F
-400 GTCCTCCTCGGGCTGAGAAA GTCCGAGGAGTCATCAGCG CCCCTCTCCAGCGCAGGCTT AGCTCCCCTTTTACGAAGGG CAGGGGAGGGCCTTCCCGC
                   MZF1 R MZF1
-300 CGTGTCCCTACCCCTTGACG ACGTCACTGCGGCGTGCTG AGGGGACAGTCTCTCAGTC TCATCAACCCG TCCCCTCCCT GCCACCCCAAGGCCACCG
                   MZF1 MZF1
    
```

**Figure S1.** Binding sites for MZF1 and HSF1 in the *CDC37* promoter. (A) Consensus DNA sequences for MZF1 and heat shock elements (HSE). (B) Putative binding sites for MZF1 and HSF1 in *CDC37*. MZF1 binding sites were enclosed with blue boxes. Putative HSE were shown with red. The sequences detected by forwarding primers (F) and reverse primers (R) in ChIP-qPCR were underlined.

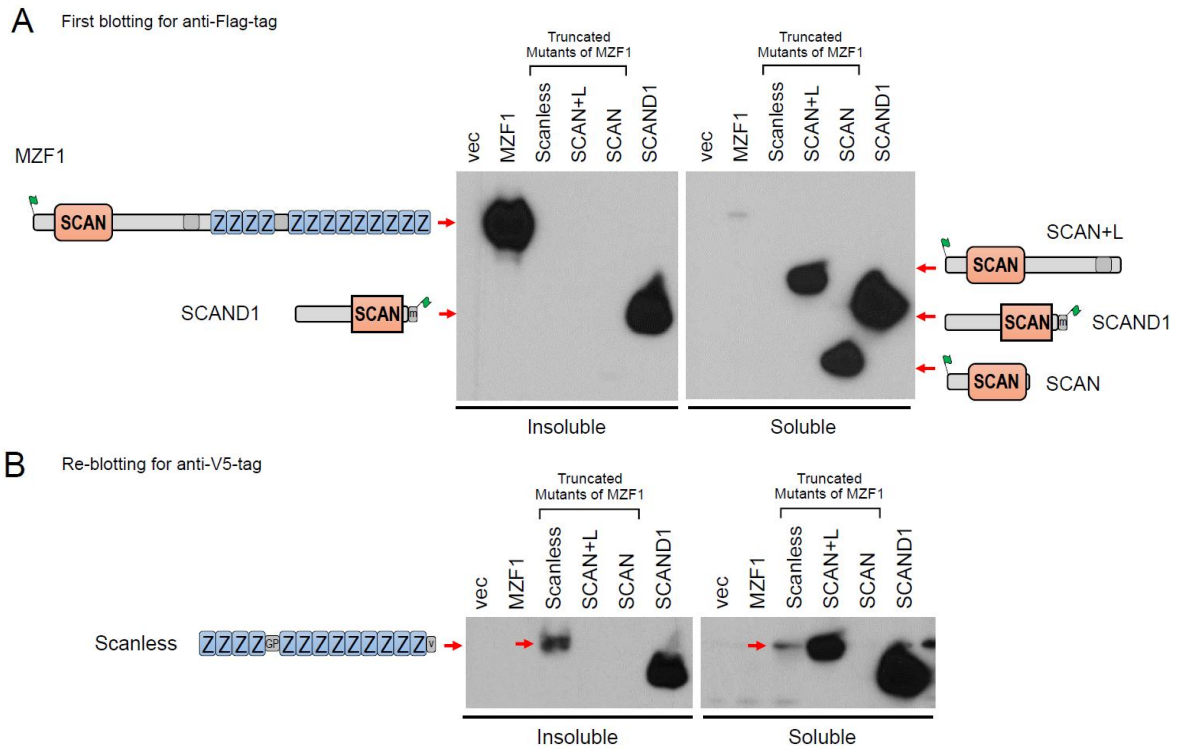

**Figure S2.** Western blotting showing overexpressed MZF1, its truncated mutants, and SCAND1. COS7 cells were transfected with plasmid constructs- Flag-MZF1, Scanless-V5, Flag-SCAN+L, Flag-SCAN, and SCAND1-Flag. The soluble cell lysate and the insoluble fraction containing chromatin were analyzed by western blotting using firstly anti-Flag tag antibody (**A**) and secondly anti-V5 tag antibody re-blotting (**B**). MZF1 and Scanless zinc-fingers-only constructs tended to be enriched in the insoluble fraction. The SCAN and SCAN+L tended to be found in the soluble fraction. SCAND1 was found in both insoluble and soluble fractions.

**Table S1.** List of siRNA sequences.

| Name of siRNA                    | Sequence (5' to 3')   |
|----------------------------------|-----------------------|
| hMZF1-all-NM_003422-53 sense     | ccaagccuuucuccauuuuTT |
| hMZF1-all-NM_003422-53 antisense | aaaugggagaaaggcuuggTT |

**Table S2.** List of primers for ChIP-qPCR.

| Name of primers       | Sequence (5' to 3')  |
|-----------------------|----------------------|
| CDC37/-1750F/160bp    | AGGGACAGTGCAAAGCAACT |
| CDC37/-1750R/160bp    | GCTTCAGCAAAACAGGGTTC |
| CDC37/-380F/115bp     | TACCACCCCGATTTAGACA  |
| CDC37/HSE/-380R/115bp | CTTCGTAAACGGGGACCTAA |

**Table S3.** List of primers for qRT-PCR.

|                   |                          |
|-------------------|--------------------------|
| CDC37-h1030F/1693 | TCCAGAAGTGCTTCGATGTG     |
| CDC37-h1140R/1693 | AGAGGCCAGAGTCAATGCAG     |
| MZF1-h785F/2620   | TGCAGGTGAAAGAGGAGTCA     |
| MZF1-h939R/2620   | AGTCTTGCTGTGGGAAAGA      |
| RPL32 F           | CAGGGTTCGTAGAAGATTCAAGGG |
| RPL32 R           | CTTGAAACATTGTGAGCGATC    |
